# Supplementary material
Source: PubMed Central journal article supplement (PMC6326191)
Supplement: NIHMS924781-supplement-Suppl__Tables.pdf [file NIHMS924781-supplement-Suppl__Tables.pdf]

## Supplementary Data

SUPPLEMENTARY TABLE S1. TOP 10 UP AND DOWN DIFFERENTIALLY REGULATED GENES IN EPIAIRWAY LUNG TISSUE, DAMS, AND OFFSPRING TISSUE AFTER MAINSTREAM CIGARETTE SMOKE EXPOSURE

|           | <i>Upregulated genes</i>  |          |                    | <i>Downregulated genes</i> |          |                    |
|-----------|---------------------------|----------|--------------------|----------------------------|----------|--------------------|
|           | <i>Associated gene ID</i> | <i>p</i> | <i>Fold change</i> | <i>Associated gene ID</i>  | <i>p</i> | <i>Fold change</i> |
| ELT       | C-FOS                     | 8.85E-05 | 3.3303             | FN1                        | 2.16E-02 | 5.3997             |
|           | CD300A                    | 1.29E-02 | 2.8970             | SPARC                      | 8.55E-03 | 3.9802             |
|           | SAG                       | 9.15E-03 | 2.5003             | CRNN                       | 1.18E-02 | 3.0898             |
|           | MATN1                     | 2.19E-03 | 2.2019             | ADAM19                     | 1.38E-03 | 2.9293             |
|           | CXCR4                     | 4.92E-03 | 2.1926             | GPC6                       | 1.06E-02 | 2.7941             |
|           | SCG3                      | 7.13E-04 | 2.1032             | MMP12                      | 6.47E-03 | 2.7559             |
|           | FRMD1                     | 2.14E-02 | 2.0700             | MMP2                       | 1.32E-02 | 2.7509             |
|           | ELMOD1                    | 3.15E-03 | 1.8967             | SRPX                       | 2.36E-04 | 2.5735             |
|           | HERC2P9                   | 2.20E-03 | 1.8487             | APOE                       | 1.33E-02 | 2.5694             |
|           | GLYATL2                   | 3.67E-02 | 1.8263             | SPOCK1                     | 1.24E-02 | 2.4189             |
| Dams      | IGHG                      | 1.28E-03 | 10.0077            | IGKV8                      | 4.55E-02 | 12.4052            |
|           | IGKV5                     | 5.29E-04 | 2.7783             | RETN                       | 4.47E-03 | 4.5923             |
|           | GZMB                      | 2.29E-04 | 2.5938             | TMEM45B                    | 3.93E-03 | 4.5373             |
|           | IGHV1                     | 1.35E-03 | 2.4647             | CAR3                       | 8.08E-04 | 4.2618             |
|           | MTFR2                     | 3.14E-03 | 2.1057             | ADIPOQ                     | 2.43E-03 | 4.2096             |
|           | IL1B                      | 2.90E-03 | 2.0812             | CFD                        | 7.08E-03 | 3.3732             |
|           | HIST1HiB                  | 4.13E-02 | 1.9907             | TFF2                       | 6.26E-03 | 2.7266             |
|           | KLRA17                    | 6.94E-03 | 1.9576             | THRSP                      | 4.08E-03 | 2.4456             |
|           | ARNTL                     | 1.08E-03 | 1.9509             | PLIN1                      | 1.07E-02 | 2.3777             |
|           | FEFV                      | 7.98E-04 | 1.9452             | MUC5B                      | 3.06E-02 | 2.3440             |
| Offspring | H2AB1                     | 0.017866 | 17.57977           | BEST1                      | 8.17E-07 | 10.84912           |
|           | H2Q7                      | 0.016136 | 15.42327           | MBNL1                      | 0.011763 | 10.23817           |
|           | TRMT61                    | 0.0028   | 8.509253           | AHDC1                      | 8.64E-06 | 7.887322           |
|           | LY6D                      | 0.010242 | 6.925174           | BAIAP2L1                   | 2.17E-05 | 7.718487           |
|           | STRA8                     | 0.002144 | 6.818615           | KCNQ1OT1                   | 9.31E-06 | 7.359658           |
|           | H2DMB2                    | 9.13E-04 | 6.113622           | TNS1                       | 5.16E-06 | 7.111162           |
|           | APOL7C                    | 0.015917 | 5.175049           | TJPs                       | 2.51E-06 | 6.984259           |
|           | IFI44L                    | 0.001521 | 5.093131           | AGAP1                      | 7.56E-06 | 6.975762           |
|           | HBB-BT                    | 0.028783 | 4.819223           | PITPNC1                    | 0.00172  | 6.867369           |
|           | IKZF4                     | 2.50E-04 | 4.78618            | ZFHX3                      | 7.63E-06 | 6.528332           |

ELT, EpiAirway lung tissue.

SUPPLEMENTARY TABLE S2. SOME OF THE LARGER GROUPS OF REVIGO-LINKED GENE ONTOLOGY TERMS OF CELLULAR COMPONENT AND MOLECULAR FUNCTION PROCESSES FOR THE EPIAIRWAY LUNG TISSUE

| <i>CC-processes</i>          | <i>Linked GO terms</i>                                                                                                                                                                          | <i>MF-processes</i>                         | <i>Linked GO terms</i>                                                                                                              |
|------------------------------|-------------------------------------------------------------------------------------------------------------------------------------------------------------------------------------------------|---------------------------------------------|-------------------------------------------------------------------------------------------------------------------------------------|
| Extracellular region part    | GO:0044421, GO:0005578, GO:0034361, GO:0005615, GO:0031012, GO:0005576.                                                                                                                         | Molecular binding.                          | GO:0001948, GO:0030674, GO:0003779, GO:0008092, GO:0008289, GO:0005488, GO:0005509, GO:0005543.                                     |
| Basolateral plasma membrane. | GO:0016323, GO:0044459, GO:0005581, GO:0043234.                                                                                                                                                 | Structural molecule activity.               | GO:0003777, GO:0008330, GO:0016817, GO:0017111, GO:0008233, GO:0003774, GO:0008237, GO:0004222, GO:0005198, GO:0005200, GO:0005201. |
| Cytoskeleton.                | GO:0005856, GO:0043005, GO:0044463, GO:0005929, GO:0044449, GO:0044441, GO:0043292, GO:0043228, GO:0044430, GO:0043232, GO:0014069, GO:0001533, GO:0042995, GO:0070161, GO:0019861, GO:0030315. | Kinase, hydrolase and transferase activity. | GO:0008603, GO:0019207, GO:0047961, GO:0019205, GO:0016787.                                                                         |

CC, cellular component; GO, gene ontology.

SUPPLEMENTARY TABLE S3. SOME OF THE LARGER GROUPS OF REVIGO-LINKED GENE ONTOLOGY TERMS OF CELLULAR COMPONENT AND MOLECULAR FUNCTION PROCESSES FOR THE DAMS

| <i>CC-processes</i>                                         | <i>Linked GO terms</i>                                                  | <i>MF processes</i> | <i>Linked GO terms</i>                                                                                                                          |
|-------------------------------------------------------------|-------------------------------------------------------------------------|---------------------|-------------------------------------------------------------------------------------------------------------------------------------------------|
| Chromosome, centromeric region and protein DNA interaction. | GO:0005694, GO:0000775, GO:0032133, GO:0030141, GO:0019814, GO:0032993. | Protein activity.   | GO:0004144, GO:0003924, GO:0060089, GO:0004872, GO:0004869, GO:0004950, GO:0004896, GO:0004871, GO:0015144, GO:0005384, GO:0015291, GO:0015294. |
| Cell surface.                                               | GO:0009897, GO:0005887, GO:0005886, GO:0044459, GO:0009986.             | Cytokine activity.  | GO:0008009, GO:0019956, GO:0005125, GO:0019955, GO:0001664, GO:0043515, GO:0005102, GO:0005070.                                                 |
| Extracellular space.                                        | GO:0044421, GO:0044421, GO:0005615, GO:0042571, GO:0005576.             | Binding.            | GO:0001872, GO:0003823, GO:0005488, GO:0060090, GO:0030246, GO:0005515, GO:0001871.                                                             |

MF, molecular function.

SUPPLEMENTARY TABLE S4. SOME OF THE LARGER GROUPS OF REVIGO LINKED GENE ONTOLOGY  
TERMS OF CELLULAR COMPONENT AND MOLECULAR FUNCTION PROCESSES FOR THE OFFSPRING

| <i>CC processes</i>   | <i>Linked GO terms</i>                                                                                                                                                                                                                                                                                                                                                                                                                                                                                                                                                                                                                                                                                                                                                                                                                                                 | <i>MF processes</i>                     | <i>Linked GO terms</i>                                                                                                                                                                                                                                                                          |
|-----------------------|------------------------------------------------------------------------------------------------------------------------------------------------------------------------------------------------------------------------------------------------------------------------------------------------------------------------------------------------------------------------------------------------------------------------------------------------------------------------------------------------------------------------------------------------------------------------------------------------------------------------------------------------------------------------------------------------------------------------------------------------------------------------------------------------------------------------------------------------------------------------|-----------------------------------------|-------------------------------------------------------------------------------------------------------------------------------------------------------------------------------------------------------------------------------------------------------------------------------------------------|
| Mitochondrion.        | GO:0015629, GO:0032432 GO:0042641, GO:0016327, GO:0005938, GO:0044448, GO:0005832, GO:0044427, GO:0005694, GO:0005905, GO:0005581, GO:0043292, GO:0005737, GO:0016023, GO:0000932, GO:0044444, GO:0009898, GO:0005856, GO:0005829, GO:0044445, GO:0022626, GO:0022627, GO:0030286, GO:0005793, GO:0000178, GO:0005794, GO:0000792, GO:0043232, GO:0043229, GO:0044424, GO:0005770, GO:0005811, GO:0030117, GO:0034708, GO:0042613, GO:0042611, GO:0042579, GO:0044455, GO:0044429, GO:0005746, GO:0005739, GO:0032982, GO:0016460, GO:0043228, GO:0005720, GO:0031981, GO:0044428, GO:0005634, GO:0000313, GO:0031090, GO:0044422, GO:0048471, GO:0005777, GO:0046930, GO:0000502, GO:0005839, GO:0043234, GO:0045259, GO:0016469, GO:0030529, GO:0030880, GO:0030017, GO:0000803, GO:0015935, GO:0001725, GO:0042825, GO:0000151, GO:0005774, GO:0005773, GO:0031982. | Cytoskeletal protein binding            | GO:0003779, GO:0003785, GO:0008013, GO:0005516, GO:0051087, GO:0008092, GO:0019899, GO:0051020, GO:0051427, GO:0042802, GO:0043560, GO:0005178, GO:0035257, GO:0048407, GO:0030674, GO:0032403, GO:0046983, GO:0019904, GO:0046982, GO:0017048, GO:0017124, GO:0046332, GO:0008134, GO:0051082. |
|                       |                                                                                                                                                                                                                                                                                                                                                                                                                                                                                                                                                                                                                                                                                                                                                                                                                                                                        | Motor activity                          | GO:0004559, GO:0042623, GO:0003689, GO:0004521, GO:0016817, GO:0016820, GO:0016788, GO:0015923, GO:0000146, GO:0003774, GO:0016791, GO:0034595, GO:0042578, GO:0033170, GO:0004540, GO:0004298, GO:0070003.                                                                                     |
|                       |                                                                                                                                                                                                                                                                                                                                                                                                                                                                                                                                                                                                                                                                                                                                                                                                                                                                        | Ubiquitin-protein transferase activity. | GO:0019200, GO:0003899, GO:0004364, GO:0004402, GO:0042054, GO:0004468, GO:0016278, GO:0004709, GO:0008168, GO:0008080, GO:0019205, GO:0004550, GO:0016773, GO:0016776, GO:0004672, GO:0008276, GO:0004674, GO:0004713, GO:0034062, GO:0016765, GO:0016741, GO:0016772, GO:0004714, GO:0004842. |
| Cell projection part. | GO:0044463, GO:0005929, GO:0030027, GO:0043005.                                                                                                                                                                                                                                                                                                                                                                                                                                                                                                                                                                                                                                                                                                                                                                                                                        | Zinc ion binding.                       | GO:0005524, GO:0043169, GO:0019992, GO:0005525, GO:0019001, GO:0043167, GO:0000287, GO:0030145, GO:0046872, GO:0003676, GO:0035091, GO:0017076, GO:0046914, GO:0008270.                                                                                                                         |
| Basement membrane.    | GO:0005604, GO:0030935.                                                                                                                                                                                                                                                                                                                                                                                                                                                                                                                                                                                                                                                                                                                                                                                                                                                |                                         |                                                                                                                                                                                                                                                                                                 |
